# Supplementary material
Source: Springer Nature journal article supplement (https://www.springermedizin.de/resource/supplementary/12947_2004_33_MOESM4_ESM.pdf/9556040)

**a** Phagocytosis Capacity - Neutrophils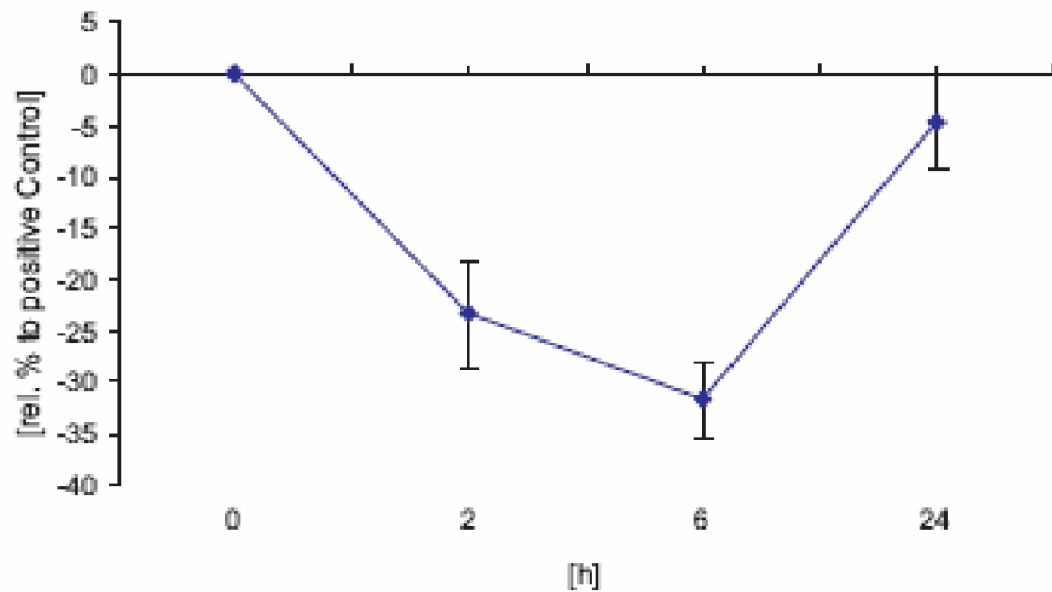**b** Phagocytosis Capacity - Monocytes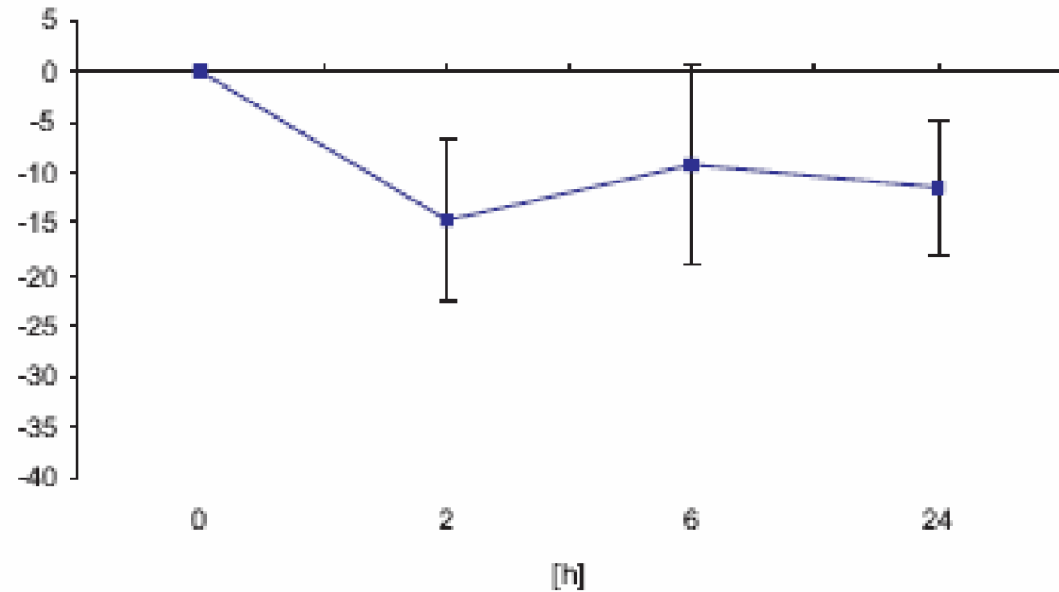

Supplement: MOESM4 [file 9556040]
